# Supplementary material
Source: HighWire-hosted journal article supplement (https://tech.snmjournals.org/highwire/filestream/10378/field_highwire_adjunct_files/0/262423_Supplemental_Data.pdf)
Supplement: 262423_Supplemental_Data.pdf [file 262423_Supplemental_Data.pdf]

| <b>Batch Number</b> | <b>Initial activity of Lu-177-<br/>PSMA-I&amp;T</b> | <b>Lu-177-PSMA-I&amp;T activity at<br/>48 hours</b> |
|---------------------|-----------------------------------------------------|-----------------------------------------------------|
| 1                   | 25.6 GBq in 25 ml                                   | 20.7 GBq in 24.5 ml                                 |
| 2                   | 28.6 GBq in 25 ml                                   | 23.12 GBq in 24.6 ml                                |
| 3                   | 14.6 GBq in 20 ml                                   | 11.72 GBq in 19.5 ml                                |
| 4                   | 14.1 GBq in 20 ml                                   | 11.32 GBq in 19.6 ml                                |
| 5                   | 22.3 GBq in 25 ml                                   | 17.9 GBq in 24.6 ml                                 |
| 6                   | 31.2 GBq in 25 ml                                   | 25.12 GBq in 24.5 ml                                |
| 7                   | 28.5 GBq in 25 ml                                   | 23.0 GBq in 24.4 ml                                 |
| 8                   | 8.7 GBq in 15 ml                                    | 6.99 GBq in 14.6 ml                                 |
| 9                   | 11.28 GBq in 15 ml                                  | 8.91 GBq in 14.5 ml                                 |
| 10                  | 32.3 GBq in 25 ml                                   | 25.8 GBq in 24.7 ml                                 |
| 11                  | 31.2 GBq in 25 ml                                   | 25.1 GBq in 24.6 ml                                 |
| 12                  | 13.5 GBq in 15 ml                                   | 10.25 GBq in 14.6 ml                                |
| 13                  | 26.3 GBq in 20 ml                                   | 21.10 GBq in 19.6 ml                                |
| 14                  | 14.6 GBq in 20 ml                                   | 11.25 GBq in 19.5 ml                                |
| 15                  | 14.1 GBq in 20 ml                                   | 11.22 GBq in 19.6 ml                                |
| 16                  | 22.3 GBq in 25 ml                                   | 17.91 GBq in 24.6 ml                                |
| 17                  | 31.2 GBq in 25 ml                                   | 24.85 GBq in 24.6 ml                                |
| 18                  | 28.5 GBq in 25 ml                                   | 23.05 GBq in 24.6 ml                                |
| 19                  | 8.7 GBq in 15 ml                                    | 6.99 GBq in 14.6 ml                                 |
| 20                  | 11.28 GBq in 15 ml                                  | 9.05 GBq in 14.6 ml                                 |
| 21                  | 14.6 GBq in 20 ml                                   | 11.65 GBq in 19.6 ml                                |
| 22                  | 14.7 GBq in 20 ml                                   | 11.25 GBq in 19.6 ml                                |
| 23                  | 21.3 GBq in 25 ml                                   | 16.95 GBq in 24.6 ml                                |
| 24                  | 31.5 GBq in 25 ml                                   | 25.23 GBq in 24.6 ml                                |
| 25                  | 28.5 GBq in 25 ml                                   | 23.0 GBq in 24.6 ml                                 |
| 26                  | 8.7 GBq in 10 ml                                    | 6.99 GBq in 9.7 ml                                  |
| 27                  | 17.8 GBq in 15 ml                                   | 14.23 GBq in 14.7 ml                                |
| 28                  | 16.6 GBq in 20 ml                                   | 13.20 GBq in 19.6 ml                                |
| 29                  | 16.1 GBq in 20 ml                                   | 12.93 GBq in 19.6 ml                                |
| 30                  | 27.3 GBq in 25 ml                                   | 21.90 GBq in 24.6 ml                                |
| 31                  | 32.2 GBq in 25 ml                                   | 25.91 GBq in 24.6 ml                                |
| 32                  | 29.5 GBq in 25 ml                                   | 23.45 GBq in 24.6 ml                                |
| 33                  | 8.7 GBq in 15 ml                                    | 6.95 GBq in 14.7 ml                                 |
| 34                  | 13.5 GBq in 15 ml                                   | 10.65 GBq in 14.6 ml                                |
| 35                  | 12.4 GBq in 15 ml                                   | 9.87 GBq in 14.6 ml                                 |

Supplemental Table 1: Initial and 48 hours Radioactivity Concentration of Lu-177-PSMA-I&T
